# Supplementary material
Source: PubMed Central journal article supplement (PMC3891896)
Supplement: NIHMS267755-supplement-GEB1.pdf [file NIHMS267755-supplement-GEB1.pdf]

1 **Appendix S1.** Description of land use types, their county of origin, as well as the biogeographic province and region of origin.

| <b>County</b> | <b>Land use</b>       | <b>Notes</b>                                | <b>CA Biogeographic Province</b> | <b>CA Biogeographic Region</b> |
|---------------|-----------------------|---------------------------------------------|----------------------------------|--------------------------------|
| Butte         | Coniferous forest     | Coniferous forest (site 1)                  | California Floristic Province    | Sierra Nevada                  |
|               |                       | Coniferous forest (site 2)                  | California Floristic Province    | Sierra Nevada                  |
| Colusa        | Inland grasslands     | Serpentine soils                            | California Floristic Province    | Northwest                      |
|               | Rice fields           | Periodically flooded                        | California Floristic Province    | Great Valley                   |
| El Dorado     | Coniferous forest     | Coniferous forest (site 1)                  | California Floristic Province    | Sierra Nevada                  |
|               |                       | Coniferous forest (sampled across 16 sites) | California Floristic Province    | Sierra Nevada                  |
| Fresno        | Annual agriculture    | Cotton fields (site 1)                      | California Floristic Province    | Great Valley                   |
|               | Annual agriculture    | Cotton fields (site 2)                      | California Floristic Province    | Great Valley                   |
|               | Coniferous forest     |                                             | California Floristic Province    | Sierra Nevada                  |
| Kern          | Perennial agriculture | Almond orchards                             | California Floristic Province    | Great Valley                   |
|               | Annual agriculture    | Cotton fields (site 1)                      | California Floristic Province    | Great Valley                   |
|               | Annual agriculture    | Cotton fields (site 2)                      | California Floristic Province    | Great Valley                   |
|               | Annual agriculture    | Cotton fields (site 3)                      | California Floristic Province    | Great Valley                   |
|               | Desert                | Mojave Desert                               | Desert Province                  | Mojave Desert                  |
|               | Perennial agriculture | Almond orchards                             | California Floristic Province    | Great Valley                   |
|               | Perennial agriculture | Fig orchards                                | California Floristic Province    | Great Valley                   |
| Kings         | Annual agriculture    | Cotton fields                               | California Floristic Province    | Great Valley                   |
|               | Perennial agriculture | Walnut orchards                             | California Floristic Province    | Great Valley                   |
| Lake          | Inland grasslands     | Serpentine soils                            | California Floristic Province    | Northwest                      |
| Mendocino     | Perennial agriculture | Vineyards (site 1)                          | California Floristic Province    | Northwest                      |
|               | Perennial agriculture | Vineyards (site 2)                          | California Floristic Province    | Northwest                      |
|               | Perennial agriculture | Vineyards (site 3)                          | California Floristic Province    | Northwest                      |
| Mono          | Desert                | Great Basin Desert                          | Great Basin Province             | Eastern Sierra Nevada          |
| Monterey      | Annual agriculture    | Dry-farmed hay fields                       | California Floristic Province    | Central Western                |
|               | Annual agriculture    | Intensively-farmed vegetable fields         | California Floristic Province    | Central Western                |
|               | Inland grasslands     | Non-serpentine soils                        | California Floristic Province    | Central Western                |
| Napa          | Perennial agriculture | Vineyards (site 1)                          | California Floristic Province    | Northwest                      |
|               | Perennial agriculture | Vineyards (site 2)                          | California Floristic Province    | Central Western                |
|               | Perennial agriculture | Vineyards (site 3)                          | California Floristic Province    | Central Western                |
| Placer        | Coniferous forest     | Coniferous forest (sampled across 9 sites)  | California Floristic Province    | Sierra Nevada                  |
| Sacramento    | Freshwater wetland    | Periodically flooded                        | California Floristic Province    | Great Valley                   |

|            |                       |                            |                               |                 |
|------------|-----------------------|----------------------------|-------------------------------|-----------------|
| Sonoma     | Coastal grasslands    | Non-serpentine soils       | California Floristic Province | Central Western |
|            | Perennial agriculture | Vineyards (site 1)         | California Floristic Province | Central Western |
|            | Perennial agriculture | Vineyards (site 2)         | California Floristic Province | Central Western |
|            | Perennial agriculture | Vineyards (site 3)         | California Floristic Province | Northwest       |
|            | Perennial agriculture | Vineyards (site 4)         | California Floristic Province | Central Western |
| Stanislaus | Perennial agriculture | Almond orchards            | California Floristic Province | Great Valley    |
|            | Perennial agriculture | Peach orchards             | California Floristic Province | Great Valley    |
| Yolo       | Annual agriculture    | Bean fields                | California Floristic Province | Great Valley    |
|            | Annual agriculture    | Corn fields (site 1)       | California Floristic Province | Great Valley    |
|            | Annual agriculture    | Corn fields (site 2)       | California Floristic Province | Great Valley    |
|            | Annual agriculture    | Safflower fields           | California Floristic Province | Great Valley    |
|            | Annual agriculture    | Tomato fields (site 1)     | California Floristic Province | Great Valley    |
|            | Annual agriculture    | Tomato fields (site 2)     | California Floristic Province | Great Valley    |
| Yuba       | Coniferous forest     | Coniferous forest (site 1) | California Floristic Province | Sierra Nevada   |
|            | Coniferous forest     | Coniferous forest (site 2) | California Floristic Province | Sierra Nevada   |
|            | Coniferous forest     | Coniferous forest (site 3) | California Floristic Province | Sierra Nevada   |
