# Supplementary material
Source: PubMed Central journal article supplement (PMC3891896)
Supplement: NIHMS267755-supplement-GEB2.pdf [file NIHMS267755-supplement-GEB2.pdf]

1 **Appendix S2.** Description of land use types, their county of origin, and associated environmental characteristics. Site-specific soil data were  
 2 not available for all sites (indicated by N.A.). MAP is mean annual precipitation.

| County    | Land use              | Notes                                          | Soil order         | Soil texture                   | Soil pH class                  | Elevation (m) | MAP (cm) | Temperature zone |
|-----------|-----------------------|------------------------------------------------|--------------------|--------------------------------|--------------------------------|---------------|----------|------------------|
| Butte     | Coniferous forest     | Coniferous forest (site 1)                     | inceptisol         | sandy loam                     | moderately acidic              | 500           | 197.4    | mesic            |
|           |                       | Coniferous forest (site 2)                     | alfisol            | loam or sandy loam             | N.A.                           | 500           | 168.4    | mesic            |
| Colusa    | Inland grasslands     | Serpentine soils                               | mollisol           | gravelly loam                  | slightly acidic                | 425           | 75.3     | thermic          |
|           | Rice fields           | Periodically flooded                           | vertisol           | clay                           | neutral                        | 30            | 53.7     | thermic          |
| El Dorado | Coniferous forest     | Coniferous forest (site 1)                     | alfisol            | loam                           | slightly acidic                | 500           | 139.5    | thermic          |
|           |                       | Coniferous forest (representative of 16 sites) | inceptisol         | ashy loam                      | N.A.                           | 2250          | 158.9    | mesic            |
| Fresno    | Annual agriculture    | Cotton fields (site 1)                         | aridisol           | clay loam                      | alkaline                       | 80            | 17.7     | thermic          |
|           | Annual agriculture    | Cotton fields (site 2)                         | mollisol           | clay loam                      | N.A.                           | 80            | 22.4     | thermic          |
|           | Coniferous forest     |                                                | inceptisol         | sandy loam                     | moderately acidic              | 2317          | 130.9    | frigid           |
| Kern      | Perennial agriculture | Almond orchards                                | aridisol           | clay loam                      | slightly alkaline              | 115           | 24.6     | thermic          |
|           | Annual agriculture    | Cotton fields (site 1)                         | N.A.               | loam, sandy loam, & silty loam | N.A.                           | 100           | 23.1     | thermic          |
|           | Annual agriculture    | Cotton fields (site 2)                         | aridisol           | clay loam                      | moderately alkaline            | 80            | 18.2     | thermic          |
|           | Annual agriculture    | Cotton fields (site 3)                         | mollisol           | clay                           | N.A.                           | 100           | 18.2     | thermic          |
|           | Desert                | Mojave Desert                                  | aridisol           | sandy loam                     | moderately & strongly alkaline | 700           | 11.9     | thermic          |
|           | Perennial agriculture | Almond orchards                                | entisol & aridisol | clay loam, loam, & silty loam  | slightly acidic                | 140           | 28.6     | thermic          |
|           | Perennial agriculture | Fig orchards                                   | aridisol           | loamy sand & sandy loam        | N.A.                           | 325           | 22.4     | thermic          |
| Kings     | Annual agriculture    | Cotton fields                                  | entisol            | sandy loam                     | slightly acidic                | 80            | 22.4     | thermic          |
|           | Perennial agriculture | Walnut orchards                                | mollisol           | loam, loamy sand, & sandy loam | N.A.                           | 80            | 23.4     | thermic          |

|                |                       |                                                                      |                      |                              |                        |      |       |            |
|----------------|-----------------------|----------------------------------------------------------------------|----------------------|------------------------------|------------------------|------|-------|------------|
| Lake Mendocino | Inland grasslands     | Serpentine soils                                                     | mollisol             | gravelly loam                | slightly acidic        | 500  | 75.3  | thermic    |
|                | Perennial agriculture | Vineyards (site 1)                                                   | alfisol              | loam                         | neutral                | 100  | 89.4  | thermic    |
|                | Perennial agriculture | Vineyards (site 2)                                                   | alfisol & inceptisol | loam                         | neutral                | 400  | 89.4  | (iso)mesic |
|                | Perennial agriculture | Vineyards (site 3)                                                   | mollisol             | loam                         | moderately acidic      | 65   | 89.4  | thermic    |
| Mono           | Desert                | Great Basin Desert Dry-farmed hay fields (representative of 7 sites) | entisol              | sand                         | very strongly alkaline | 2000 | 16.0  | N.A.       |
| Monterey       | Annual agriculture    | Intensively-farmed vegetable fields (representative of 5 sites)      | mollisol             | sandy loam                   | N.A.                   | 50   | 41.3  | thermic    |
|                | Annual agriculture    | Non-serpentine soils (representative of 25 sites)                    | mollisol             | sandy loam                   | N.A.                   | 50   | 41.3  | thermic    |
|                | Inland grasslands     |                                                                      | mollisol             | sandy loam                   | N.A.                   | 600  | 39.2  | thermic    |
| Napa           | Perennial agriculture | Vineyards (site 1)                                                   | mollisol             | gravelly loam                | moderately acidic      | 1400 | 75.6  | thermic    |
|                | Perennial agriculture | Vineyards (site 2)                                                   | entisol              | clay loam                    | slightly acidic        | 50   | 59.7  | thermic    |
|                | Perennial agriculture | Vineyards (site 3)                                                   | ultisol              | loam                         | moderately acidic      | 50   | 59.7  | thermic    |
| Placer         | Coniferous forest     | Coniferous forest (representative of 9 sites)                        | inceptisol           | ashy loam                    | N.A.                   | 2250 | 158.9 | mesic      |
| Sacramento     | Freshwater wetland    | Periodically flooded                                                 | histosol             | clay                         | slightly acidic        | 5    | 43.1  | thermic    |
| Sonoma         | Coastal grasslands    | Non-serpentine soils                                                 | entisol              | loamy sand                   | slightly acidic        | 25   | 135.0 | isomesic   |
|                | Perennial agriculture | Vineyards (site 1)                                                   | ultisol              | loam                         | neutral                | 100  | 121.2 | thermic    |
|                | Perennial agriculture | Vineyards (site 2)                                                   | entisol              | clay loam                    | neutral                | 50   | 59.7  | thermic    |
|                | Perennial agriculture | Vineyards (site 3)                                                   | entisol              | sandy loam                   | very strongly acidic   | 50   | 91.1  | thermic    |
|                | Perennial agriculture | Vineyards (site 4)                                                   | mollisol             | clay                         | neutral                | 100  | 59.7  | thermic    |
| Stanislaus     | Perennial agriculture | Almond orchards                                                      | entisol              | loamy sand                   | slightly acidic        | 105  | 23.0  | thermic    |
|                | Perennial agriculture | Peach orchards                                                       | entisol              | sand                         | slightly acidic        | 110  | 23.0  | thermic    |
| Yolo           | Annual agriculture    | Bean fields                                                          | entisol              | silty loam                   | slightly acidic        | 30   | 53.7  | thermic    |
|                | Annual agriculture    | Corn fields (site 1)                                                 | alfisol & inceptisol | silty loam & silty clay loam | slightly acidic        | 30   | 53.7  | thermic    |

|      |                    |                            |                      |                              |                   |      |       |         |
|------|--------------------|----------------------------|----------------------|------------------------------|-------------------|------|-------|---------|
|      | Annual agriculture | Corn fields (site 2)       | entisol              | silty loam                   | slightly acidic   | 30   | 53.7  | thermic |
|      | Annual agriculture | Safflower fields           | entisol              | silty loam                   | slightly acidic   | 30   | 53.7  | thermic |
|      | Annual agriculture | Tomato fields (site 1)     | alfisol & inceptisol | silty loam & silty clay loam | slightly acidic   | 30   | 53.7  | thermic |
|      | Annual agriculture | Tomato fields (site 2)     | entisol              | silty loam                   | slightly acidic   | 30   | 53.7  | thermic |
| Yuba | Coniferous forest  | Coniferous forest (site 1) | ultisol & alfisol    | clay                         | N.A.              | 2317 | 174.0 | mesic   |
|      | Coniferous forest  | Coniferous forest (site 2) | ultisol              | clay                         | N.A.              | 2317 | 174.0 | mesic   |
|      | Coniferous forest  | Coniferous forest (site 3) | ultisol              | loam                         | moderately acidic | 1000 | 163.4 | mesic   |

1
